# Supplementary material
Source: PubMed Central journal article supplement (PMC545815)
Supplement: 7600526s1.pdf [file 7600526s1.pdf]

## Supplementary Materials

### “Identification of neuromedin S and its possible role in the mammalian circadian oscillator system” by K. Mori *et al.*

#### Supplementary Data

##### *Bioinformatic analysis of the neuromedin S (NMS) gene*

To analyze the structure of the *NMS* gene, public genome databases were searched using the full-length sequence of mouse *NMS* cDNA as a query sequence. The *NMS* genomic sequence was identified in one genomic contig of mouse chromosome 1 (RefSeq accession number NT\_080070). The mouse *NMS* gene was ~11 kbp in length, which is ~11 times the length of the cDNA. The gene was composed of 10 exons interrupted by 9 introns (see Supplementary Figure S1A). The nucleotide sequences at the 5'-donor and 3'-acceptor sites of all introns conformed to the GT/AG rules (Shapiro & Senapathy, 1987) (see Supplementary Table SI). The structures of the rat and human *NMS* genes were also analyzed, and all exon-intron boundaries were conserved among mouse, rat and human (see Supplementary Tables SII and SIII).

The transcription initiation site of the mouse *NMS* gene was identified by RNA ligase-mediated rapid amplification of cDNA ends (RACE) PCR, which is able to determine the 5'-end of full-length mRNA. 5'-RACE PCR yielded a single product. The sequencing of this product showed that the initiation site is 137 bp upstream of the ATG translation initiation codon (see Supplementary Figure S1B). The first 400 bp of the 5'-flanking region of the *NMS* gene shows particularly high sequence identity (> 71%) among mouse, rat and human (see Supplementary Figure S1B), and regions further upstream are also conserved in some places. Computational analysis showed that there is no TATA-box or CCAAT sequence adjacent to the transcription initiation site. These genes share several putative binding sites for transcription factors including GATA-1 (Merika & Orkin, 1993), Oct-1 (Groenen *et al.*, 1992), Sox-5 (Denny *et al.*, 1992) and

AP-1 (Rauscher *et al*, 1988) in the highly conserved 5'-flanking region (see Supplementary Figure S1B). Neither a cAMP-responsive element nor a CACGTG E-box sequence was found within the first 3 kbp of the 5'-flanking regions of the mouse, rat and human *NMS* genes. These two putative binding sites are involved in photic-induction and intrinsic circadian rhythmicity of gene expression, respectively (Reppert & Weaver, 2001).

## **Supplementary Materials and methods**

### ***Computational analysis of the NMS gene***

The sequences of the *NMS* genes were obtained from genome databases using BLAST programs (<http://www.ncbi.nlm.nih.gov/BLAST>). Exon sequences and exon-intron boundaries were defined by comparison with cDNAs and by the GT/AG rule. The putative binding sites for transcription factors were analyzed using the TFSEARCH program (<http://www.cbrc.jp/research/db/TFSEARCH.html>) with the TRANSFAC database (Heinemeyer *et al*, 1998).

### ***Chick rectum contraction assay***

The chick rectum contraction assay was performed according to the method of Currie *et al*, (1983). Contractile activity was measured using strips of freshly isolated chick rectum in 3 ml of Krebs-Henseleit solution at 37 °C.

### ***Measurement of blood pressure***

Systemic blood pressure was continuously monitored in Sprague-Dawley rats anesthetized with pentobarbital (50 mg/kg) from the carotid artery as described previously (Minamino *et al*, 1985). Test samples were dissolved in 100 µl of saline and administered through a catheter in the jugular vein.

### ***Intranuclear administration of NMS into the suprachiasmatic nucleus (SCN)***

Intranuclear administration into the SCN was performed according to the method of Piggins *et al*, (1995) with slight modifications. Rats were allowed to run free under constant darkness for 2 weeks. Each rat was then implanted with a 26-gauge stainless steel guide cannula projecting to the SCN according to the coordinates of Paxinos & Watson (1998). Test samples were dissolved in 1  $\mu$ l of saline and administered via a 31-gauge stainless steel injector inserted to extend 1 mm below the end of the guide cannula. Locomotor activity was recorded for 2 weeks before and after administration as described previously (Nakahara *et al*, 2004). Correct cannula placement was confirmed by histological analysis at the end of the experiment period. Rats received an injection of 1  $\mu$ l India ink to mark the injection site, and were then decapitated. The brains were immediately frozen, sliced on a cryostat into 20  $\mu$ m coronal sections and stained with crystal violet. Sections were compared to the corresponding sections from the rat brain atlas (Paxinos & Watson, 1998). Data were excluded when the injection site extended more than 200  $\mu$ m outside the SCN.

### **Supplementary References**

- Currie MG, Geller DM, Cole BR, Boylan JG, YuSheng W, Holmberg SW, Needleman P (1983) Bioactive cardiac substances: potent vasorelaxant activity in mammalian atria. *Science* **221**: 71-73
- Denny P, Swift S, Connor F, Ashworth A (1992) An SRY-related gene expressed during spermatogenesis in the mouse encodes a sequence-specific DNA-binding protein. *EMBO J* **11**: 3705-3712

- Groenen MAM, Dijkhof RJM, van der Poel JJ, van Diggelen R, Verstege E (1992) Multiple octamer binding sites in the promoter region of the bovine  $\kappa$ 2-casein gene. *Nucleic Acids Res* **20**: 4311-4318
- Heinemeyer T, Wingender E, Reuter I, Hermjakob H, Kel AE, Kel OV, Ignatieva EV, Ananko EA, Podkolodnaya OA, Kolpakov FA, Podkolodny NL, Kolchanov NA (1998) Databases on transcriptional regulation: TRANSFAC, TRRD and COMPEL. *Nucleic Acids Res* **26**: 362-367
- Merika M, Orkin SH (1993) DNA-binding specificity of GATA family transcription factors. *Mol Cell Biol* **13**: 3999-4010
- Minamino N, Kangawa K, Matsuo H (1985) Neuromedin U-8 and U-25: novel uterus stimulating and hypertensive peptides identified in porcine spinal cord. *Biochem Biophys Res Commun* **130**: 1078-1085
- Nakahara K, Hanada R, Murakami N, Teranishi H, Ohgusu H, Fukushima N, Moriyama M, Ida T, Kangawa K, Kojima M (2004) The gut-brain peptide neuromedin U is involved in the mammalian circadian oscillator system. *Biochem Biophys Res Commun* **318**: 156-161
- Paxinos G, Watson C (1998) *The rat brain in stereotaxic coordinates*. Academic Press, New York, USA
- Piggins HD, Antle MC, Rusak B (1995) Neuropeptides phase shift the mammalian circadian pacemaker. *J Neurosci* **15**: 5612-5622
- Rauscher FJ 3rd, Sambucetti LC, Curran T, Distel RJ, Spiegelman BM (1988) Common DNA binding site for Fos protein complexes and transcription factor AP-1. *Cell* **52**: 471-480
- Reppert SM, Weaver DR (2001) Molecular analysis of mammalian circadian rhythms. *Annu Rev Physiol* **63**: 647-676

Shapiro MB, Senapathy P (1987) RNA splice junctions of different classes of eukaryotes: sequence statistics and functional implications in gene expression. *Nucleic Acids Res* **15**: 7155-7174
