# Supplementary material
Source: PubMed Central journal article supplement (PMC545815)
Supplement: 7600526s3.pdf [file 7600526s3.pdf]

## Supplementary Figure S2

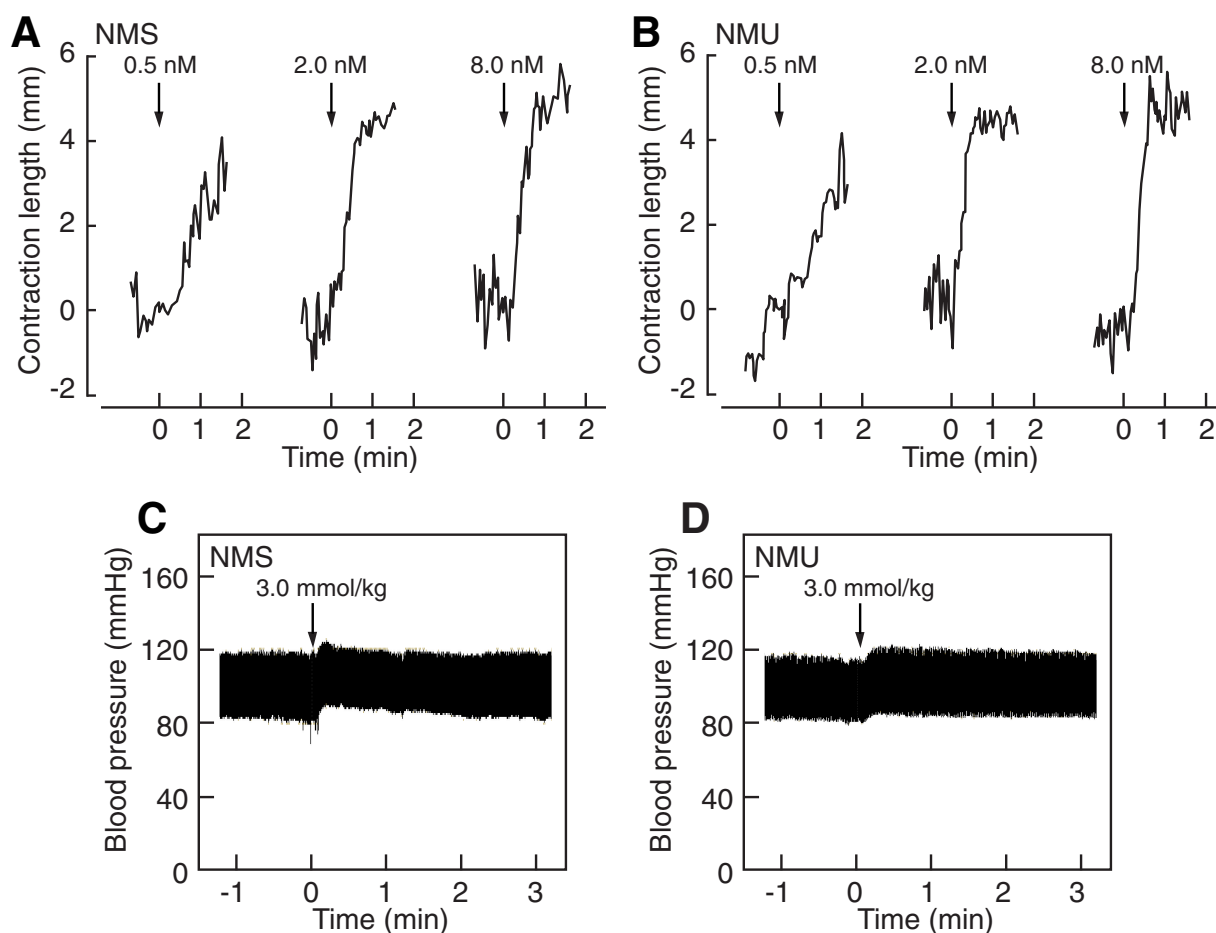

**Supplementary Figure S2** Effects of NMS on chick rectum contraction and rat systemic blood pressure compared with the effects of NMU. (**A, B**) The contractility of chick rectum. NMS (**A**) and NMU (**B**) were added to the bath at the indicated concentrations. Each arrow indicates the time of sample addition. (**C, D**) Rat systemic blood pressure. The indicated amounts of NMS (**C**) and NMU (**D**) were administered to rats at the time indicated by the arrow. Both assays were performed as described in "Supplementary materials and methods."
