# Supplementary material
Source: PubMed Central journal article supplement (PMC545815)
Supplement: 7600526s4.pdf [file 7600526s4.pdf]

## Supplementary Figure S3

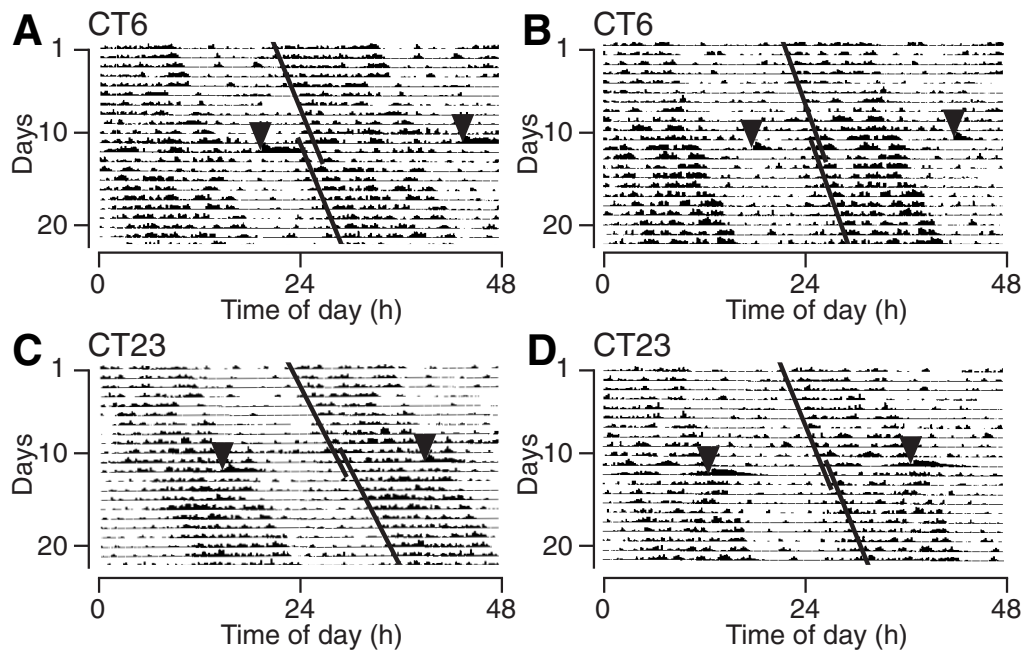

**Supplementary Figure S3** Phase shifts of the circadian rhythm of locomotor activity induced by intranuclear administration of NMS into the SCN. Representative doubled-plotted actograms of locomotor activity are shown. Rat NMS (0.1 nmol) was administered directly into the SCN at CT6 (A, B) and CT23 (C, D). Each arrowhead indicates the time of NMS administration. Each line shows the regression lines drawn based on the daily onset of locomotor activity before and after administration. Experiments were performed as described in "Supplementary materials and methods."
