# Supplementary material
Source: PubMed Central journal article supplement (PMC545815)
Supplement: 7600526s5.pdf [file 7600526s5.pdf]

**Supplementary Table SI** Exon-intron boundaries of the mouse *NMS* gene

| Exon number | Exon size | Sequence at exon/intron junction |                               | Intron size |
|-------------|-----------|----------------------------------|-------------------------------|-------------|
|             |           | 5'-splice donor                  | 3'-splice acceptor            |             |
| 1           | 213 bp    | CCTCCTCAGgtaaggg<br>roSerSerG    | gttacagGAGCTTCCC<br>lyAlaSerP | 2149 bp     |
| 2           | 56 bp     | GATCCTGAGgtatgct<br>AspProGlu    | cttttagCGACTGGAC<br>ArgLeuAla | 300 bp      |
| 3           | 51 bp     | CAACCTAAGgtaaaaa<br>GlnProLys    | cttccagGAAAACCAG<br>GluAsnGln | > 2.0 kbp   |
| 4           | 24 bp     | TACAAAAGGgtgagga<br>TyrLysArg    | tatctagTTTTTATTT<br>PheLeuPhe | 94 bp       |
| 5           | 54 bp     | AGCGCTGAGgtccgta<br>SerAlaGlu    | gttgcagTTTGCTCCG<br>PheAlaPro | 1946 bp     |
| 6           | 84 bp     | CTGCGCCTCgtatgtg<br>LeuArgLeu    | tttccagGATTCCAGG<br>AspSerArg | 815 bp      |
| 7           | 36 bp     | CCTAAGAAGgtatgtg<br>ProLysLys    | gttgcagGATCCTACT<br>AspProThr | 569 bp      |
| 8           | 42 bp     | CTTTTCAGGgtataat<br>LeuPheArg    | ttttcagCCTAGGAAT<br>ProArgAsn | 1027 bp     |
| 9           | 47 bp     | GACAGCAAGgtttgct                 | tttgcagAGTCCCATG              | 1207 bp     |
| 10          | 394 bp    | TAGAAGATT                        |                               |             |

The exon and intron sequences are shown in uppercase and lowercase letters, respectively.
