# Supplementary material
Source: PubMed Central journal article supplement (PMC545815)
Supplement: 7600526s6.pdf [file 7600526s6.pdf]

**Supplementary Table SII** Exon-intron boundaries of the rat *NMS* gene

| Exon number | Exon size | Sequence at exon/intron junction |                               | Intron size |
|-------------|-----------|----------------------------------|-------------------------------|-------------|
|             |           | 5'-splice donor                  | 3'-splice acceptor            |             |
| 1           | N.D.      | CCTCCTCAGgtaaggg<br>roSerSerG    | gtgatagGAGCTTCTC<br>lyAlaSerP | 2058 bp     |
| 2           | 56 bp     | GACCCAGAGgtatgct<br>AspProGlu    | ctttcagCGACTGGCA<br>ArgLeuAla | 305 bp      |
| 3           | 51 bp     | CAACCTAAGgtaatat<br>GlnProLys    | cttccagGAAAGCCGG<br>GluSerArg | 2169 bp     |
| 4           | 24 bp     | TACAAAAGGgtgagga<br>TyrLysArg    | cgttcagTTTTTATTT<br>PheLeuPhe | 90 bp       |
| 5           | 54 bp     | AACTCCGAGgtctgtg<br>AsnSerGlu    | gttgcagTTTGCTCCC<br>PheAlaPro | 1788 bp     |
| 6           | 84 bp     | CTGCACACagtaggtg<br>LeuHisThr    | ttcccagGATTCCAGG<br>AspSerArg | 932 bp      |
| 7           | 36 bp     | CCTAAGAAGgtatgtg<br>ProLysLys    | gttacagGATCCTACC<br>AspProThr | 626 bp      |
| 8           | 42 bp     | CTTTTCAGGgtatagc<br>LeuPheArg    | N.D. CCTAGGAAT<br>ProArgAsn   | >0.5 kb     |
| 9           | 44 bp     | GACGGCAAG N.D.                   | N.D. AATCCTATG                | >0.5 kb     |
| 10          | N.D.      | N.D.                             |                               |             |

The exon and intron sequences are shown in uppercase and lowercase letters, respectively. The genomic sequence of the *NMS* gene was identified in one genomic contig of rat chromosome 9 (RefSeq accession number NW\_047814). N.D., not determined.
