# Supplementary material
Source: PubMed Central journal article supplement (PMC545815)
Supplement: 7600526s7.pdf [file 7600526s7.pdf]

**Supplementary Table SIII** Exon-intron boundaries of the human *NMS* gene

| Exon number | Exon size | Sequence at exon/intron junction |                               | Intron size |
|-------------|-----------|----------------------------------|-------------------------------|-------------|
|             |           | 5'-splice donor                  | 3'-splice acceptor            |             |
| 1           | N.D.      | CCTCCTCAGgtaaggg<br>roSerSerG    | acaatagGATTTCTC<br>lyPheProG  | 2230 bp     |
| 2           | 56 bp     | CAGCTTGAGgtaccca<br>GlnLeuGlu    | tttttagCAGCTGGCA<br>GlnLeuAla | 638 bp      |
| 3           | 51 bp     | CAACCTAAGgtaaaaa<br>GlnProLys    | tttccagGATAATCAA<br>AspAsnGln | 3704 kb     |
| 4           | 24 bp     | TACAAAAGGgtgagta<br>TyrLysArg    | tatttagTTTTTGTTT<br>PheLeuPhe | 93 bp       |
| 5           | 54 bp     | AAAACCTGGGgtcagta<br>LysTheGly   | gttgcagTTTCCTCCA<br>PheProPro | 1938 bp     |
| 6           | 75 bp     | CTGCAGCGAgtacgtg<br>LeuGlnArg    | cttgcagGGCTCGGGG<br>GlySerGly | 1068 bp     |
| 7           | 36 bp     | ACCAAGAAGgtacaca<br>TheLysLys    | gttgcagGATCACACT<br>AspHisThr | 594 bp      |
| 8           | 42 bp     | CTTTTCAGGgtatagc<br>LeuPheArg    | ttttcagCCCAGGAAT<br>ProArgAsn | 1109 bp     |
| 9           | 35 bp     | TGAGGCCCAgtaggta<br>pGluAlaGl    | tttttagGATTCAGTG<br>nIleGlnTr | 940 bp      |
| 10          | N.D.      | N.D.                             |                               |             |

The exon and intron sequences are shown in uppercase and lowercase letters, respectively. The genomic sequence of the *NMS* gene was identified in one genomic contig of human chromosome 2 (RefSeq accession number NT\_086620). N.D., not determined.
